1 Running head: SOCIAL AUTONOMICS

2

3

4

5 **Autonomic arousal tracks outcome salience not valence**

6 **in monkeys making social decisions**

7

8

9 Benjamin M. Basile<sup>1,\*</sup>, Jessica A. Joiner<sup>2,\*</sup>, Olga Dal Monte<sup>2,3</sup>, Nicholas A. Fagan<sup>2</sup>, Chloe L.

10 Karaskiewicz<sup>1</sup>, Daniel R. Lucas<sup>1</sup>, Steve W. C. Chang<sup>2,4,5,\*\*</sup>, Elisabeth A. Murray<sup>1,\*\*</sup>

11 <sup>1</sup>Section on the Neurobiology of Learning and Memory, Laboratory of Neuropsychology,  
12 National Institute of Mental Health, National Institutes of Health, Bethesda, MD, 20892, USA

13 <sup>2</sup>Department of Psychology, Yale University, New Haven, CT, 06511, USA

14 <sup>3</sup>Department of Psychology, University of Turin, Torino, Italy

15 <sup>4</sup>Department of Neuroscience, Yale School of Medicine, New Haven, CT, 06520, USA

16 <sup>5</sup>Kavli Institute for Neuroscience, Yale School of Medicine, New Haven, CT, 06520, USA

17 \*These authors contributed equally to this work

18 \*\*These authors contributed equally to this work

19

20

21

22

23 **Correspondence to:**

24 Benjamin M. Basile

25 Laboratory of Neuropsychology, NIMH

26 Building 49, Suite 1B80

27 49 Convent Drive

28 Bethesda, Maryland 20892-4415

29 USA

30

31 **Tel:** +1 301 496 0061

32 **E-mail:** benjamin.basile@nih.gov

## 33 **Abstract**

34 The evolutionary and neural underpinnings of human prosociality are still largely unknown. A  
35 growing body of evidence suggests that some species find the sight of another individual  
36 receiving a reward reinforcing, often called vicarious reinforcement. One hypothesis is that  
37 vicarious reward is reinforcing because it is arousing like a primary reward. We evaluated this  
38 hypothesis by measuring the autonomic pupil response of eight monkeys across two laboratories  
39 in two different versions of a vicarious reinforcement paradigm. Monkeys were cued as to  
40 whether an upcoming reward would be delivered to them, another monkey, or nobody and could  
41 accept or decline the offer. As expected, all monkeys in both laboratories showed a marked  
42 preference for juice to the self, together with a reliable prosocial preference for juice to a social  
43 partner compared to juice to nobody. However, contrary to the autonomic arousal hypothesis, we  
44 found that pupils were widest in anticipation of juice to the self, moderately-sized in anticipation  
45 of juice to nobody, and narrowest in anticipation of juice to a social partner. This effect was seen  
46 across both laboratories and regardless of specific task parameters. The seemingly paradoxical  
47 pupil effect can be explained by a model in which pupil size tracks outcome salience, prosocial  
48 tendencies track outcome valence, and the relation between salience and valence is U-shaped.

49

50 Keywords: vicarious reinforcement, social valuation, pupillometry, rhesus monkeys, anterior  
51 cingulate cortex, prosociality

## 52 **1. Introduction**

53 Humans watch game shows partly because we like seeing others get rewarded. This phenomenon  
54 is often called vicarious reinforcement. A growing body of comparative evidence suggests that  
55 vicarious reinforcement is a fundamental cognitive mechanism supporting social behavior in  
56 primates. For example, rhesus monkeys will choose to give juice to a partner monkey more often  
57 than choose to withhold juice<sup>1</sup>. Monkeys that choose to give juice to another monkey also work  
58 to withhold aversive air puffs from that same monkey and these choices correlate with the  
59 strength of the pair's affiliative relationship<sup>2</sup>. Moreover, chimpanzees will choose to deliver  
60 rewards to both themselves and another chimp over just themselves<sup>3</sup>. Importantly, the tendency  
61 to give reward in these experimental settings depends on the presence of the other individual; no  
62 prosocial tendency is shown when reward goes to a collection jar instead of a conspecific.

63 However, prosocial behaviors are not always the prepotent tendency in primates. Monkeys tend  
64 to defect rather than cooperate in classic economics games<sup>4</sup>, offering reward to another monkey  
65 can cause monkeys to work less<sup>5</sup>, the same monkeys who choose to give juice to another rather  
66 than have it go to nobody will also choose to only get juice themselves rather than get juice  
67 jointly with another monkey<sup>1</sup>, and both monkeys and apes often show robust disregard across  
68 multiple tasks for whether a partner receives a reward<sup>6</sup>. Thus, it is still unclear what features and  
69 parameters modulate vicarious reinforcement and how much it generalizes to different situations.

70

71 Researchers have made good progress in understanding the cognitive and neural underpinnings  
72 of vicarious reinforcement via studies of monkeys performing social reward allocation tasks. In  
73 one prominent example of this task<sup>1</sup>, two monkeys – an actor and a recipient – sit at right angles  
74 to each other. Each faces a computer screen that displays visual cues that predict juice (reward)

75 outcomes. The actor monkey is either cued about an upcoming juice outcome or chooses  
76 between two outcomes. The typical outcome conditions are juice to the *self*, juice to the *other*  
77 monkey, juice to *both* monkeys, or juice to *neither* monkey. Critically, these options are always  
78 paired in choice trials such that there is no primary reward gain or loss from the perspective of  
79 the actor monkeys, controlling for a confound in self reward contingency. As expected, monkeys  
80 strongly prefer receiving juice themselves. Interestingly, they also prefer juice being received by  
81 the *other* monkey over *neither* monkey. In this behavioral paradigm, neurons in the rostral  
82 anterior cingulate gyrus (ACCg) code the chosen social outcome<sup>7</sup> and neurons in the amygdala  
83 code the value of juice amount similarly regardless of whether it is delivered to the self or the  
84 other monkey, but not when it is delivered to a jar in the nonsocial control condition<sup>8</sup>. In a  
85 similar paradigm, researchers found neurons in the dorsal convexity of the medial prefrontal  
86 cortex that selectively coded reward for either the actor monkey or a partner monkey<sup>9</sup>.

87

88 One hypothesis for the vicarious reinforcement effect is that monkeys' prosocial tendencies are  
89 based on the autonomic arousal associated with anticipation of the reward outcome. Accordingly,  
90 they choose reward to the *self* most often because it is most arousing, reward to *other* moderately  
91 often because it is moderately arousing, and reward to *neither* least often because it is least  
92 arousing. This would be consistent with how monkeys' pupil size, a common indicator of  
93 autonomic arousal, behaves during nonsocial tasks: pupil dilation reliably increases with the  
94 amount of juice predicted by a stimulus<sup>10</sup>. Neurally, it would be consistent with the population  
95 average activity of ACCg neurons; these neurons are most active for rewards to the *self*,  
96 moderately active for rewards to the *other*, and least active for rewards to *neither*<sup>7</sup>.

97

98 To evaluate the degree to which monkeys' prosocial tendencies are linked to their arousal, and  
99 thus guide future research in investigating neural computations guiding these social judgments,  
100 we measured pupil size as monkeys chose whether to accept or reject juice offers to themselves  
101 or a partner in a social reward allocation task. If social preferences are driven by arousal, then we  
102 predict that pupil size will scale monotonically with prosocial tendencies, with pupil largest in  
103 anticipation of *self* rewards, next largest in anticipation of *other* rewards, and smallest in  
104 anticipation of *neither* rewards. If this pattern of pupil size is not found, then some other factor  
105 must be responsible for prosocial tendencies. To assess the generality of our findings, we  
106 conducted this study in two separate laboratories that used monkeys with different life histories,  
107 behavioral test setups with different physical arrangements, stimuli with different perceptual  
108 properties, and social reward allocation tasks with different parameters. Experiment 1 reports  
109 results from the laboratory in Bethesda, MD and Experiment 2 reports results from the laboratory  
110 in New Haven, CT.

111

## 112 **2. Experiment 1 – Bethesda laboratory**

### 113 **2.1 Methods**

#### 114 **2.1.1 Subjects**

115 Nine adult male rhesus macaques (*Macaca mulatta*) housed at the National Institute of Mental  
116 Health in Bethesda, MD participated in the experiment (mean age at start = 6.5 yrs), six as actor  
117 monkeys and three as recipient monkeys. Monkeys were housed singly due to the constraints of a  
118 subsequent experiment, but had visual and auditory access to multiple conspecifics in the room.  
119 Two actors each were assigned to a dedicated recipient and housed directly across from that  
120 recipient. Thus, all actors and recipients were familiar with each other. Housing was on a 12:12

121 light:dark cycle with *ad libitum* food. Daily fluid was controlled such that monkeys maintained  
122 good test motivation in the test apparatus, good health, and a weight above 85% of their free-  
123 feeding weight. Prior to this study, we implanted each monkey with a titanium head post to allow  
124 head-restrained eye tracking<sup>11</sup> and shaped each monkey to perform a basic oculomotor saccade  
125 task. All procedures were reviewed and approved by the National Institute of Mental Health  
126 (NIMH) Animal Care and Use Committee and complied with US law.

127

### 128 **2.1.2 Apparatus and Stimuli**

129 We tested monkeys in pairs in a sound-attenuating chamber (Crist). Actors sat in a primate chair  
130 facing a computer monitor (22.86 cm wide × 30.48 cm tall) at a distance of approximately 54  
131 cm. Recipients sat in a primate chair such that their head was immediately to the right of the  
132 monitor (actor's view) and they faced over the actor's right shoulder (Fig 1a). This placed both  
133 monkeys in easy view of each other, but not directly facing each other as direct gaze can evoke  
134 aggression in rhesus macaques<sup>12</sup>. Both monkeys were head restrained during testing. A camera  
135 positioned at the lower right corner of the monitor tracked the actor's eye position and pupil  
136 width. Juice (50:50 apple juice:water) was delivered via hidden tubing to one of two metal spouts  
137 positioned at the mouth of either the actor or recipient. Pressurized juice-delivery systems  
138 (Precision Engineering) were housed outside the chamber and delivery was gated by solenoids  
139 housed in their own sound-attenuating box. This box effectively silenced the juice delivery,  
140 rendering it undetectable by two separate humans who performed forced-choice and yes-no  
141 detection tests (proportion correct = 50% and  $d' = 0.0$ , respectively). In addition, a sound meter  
142 placed ~5 cm away from the box did not register any sound increase from rapid solenoid firing  
143 when the lid was closed (max. sound level during juice delivery with sound-attenuating box open

144 = 58.82 db ( $\pm$  0.60), during delivery with box closed = 49.89 db ( $\pm$  1.10), and not during delivery  
145 = 50.42 db ( $\pm$  1.17)). Still, to rule out any contribution of the solenoid to monkey's behavior, we  
146 took two additional precautions. First, the sound-attenuating box housed a third dummy solenoid  
147 that fired on *neither* reward trials, and a recorded audio clip of a solenoid firing was played  
148 inside the monkey testing chamber on every completed trial regardless of reward outcome.  
149 Stimuli were two abstract shapes that could appear in one of four orientations to signal the start  
150 of the trial or one of the three juice offers (Fig 1c). One shape was used on Social sessions and  
151 the other was used on Nonsocial control sessions in which the recipient monkey was replaced  
152 with a juice collection receptacle (Fig 1b).  
153

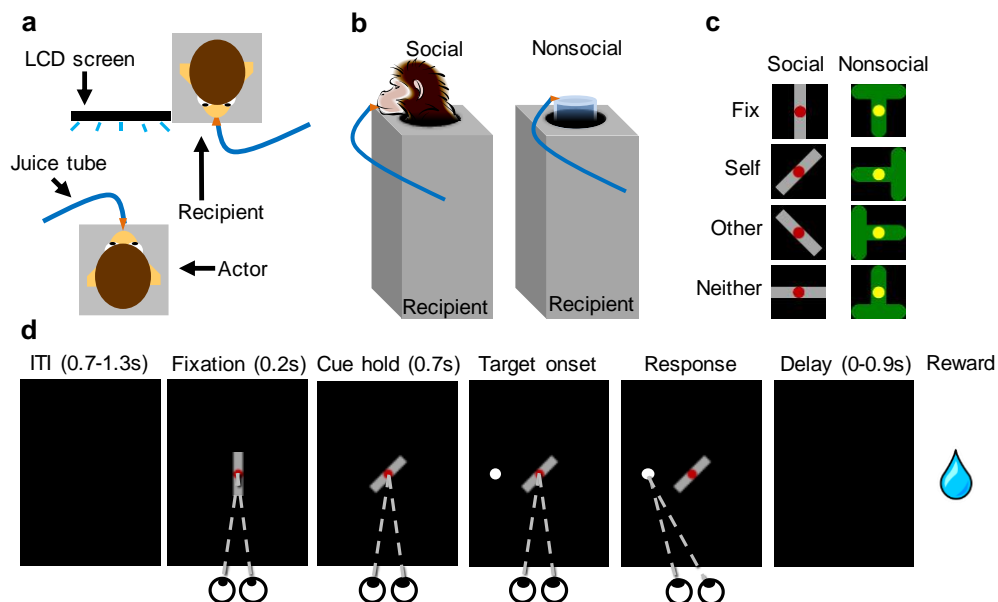

154

155 **Figure 1. Social reward allocation task used in Experiment 1.** a. Top-down schematic  
156 of the test arrangement with the actor monkey facing an LCD screen next to a recipient.  
157 b. Schematic side view of juice delivery to recipient or juice collection cylinder in Social  
158 and Nonsocial sessions. c. Stimuli used in the Social and Nonsocial sessions. The cues

159 used for fixation were rotated to create the three reward conditions. d. Schematic of the  
160 trial progression in a Social session in which the stimulus signals that 'reward to self' is  
161 on offer. Each square depicts the LCD screen as seen by the monkey. If the monkey  
162 completed the saccade to the peripheral target, the reward condition on offer for that trial  
163 was implemented. Note that the white peripheral saccade target appeared equally often in  
164 one of eight locations equidistant from the center.

165

### 166 **2.1.3 Behavioral procedures**

167 Two monkeys participated in the task at a given time, one actor and one recipient. The six actors  
168 were matched with three dedicated recipients such that each recipient worked with two actors,  
169 actors always worked with the same recipient, and no actor ever served as recipient.

170

171 Each trial began with the onset of the fixation stimulus (Fig 1d). After an actor monkey acquired  
172 and held central fixation for 0.2 s, the stimulus was replaced with one of three alternative  
173 orientations that predicted one of three juice outcomes: *self*, *other*, or *neither*. *Self* trials delivered  
174 juice to the actor, *other* trials delivered juice to the recipient on Social sessions or the juice  
175 receptacle on Nonsocial sessions, and *neither* trials delivered no juice. To accept the juice offer,  
176 the actor monkey had to maintain fixation for an additional 0.7 s until a peripheral saccade target  
177 appeared in one of eight equidistant locations, and then had to make a saccade to that target.

178 After a random delay of 0.0-0.9 s, the signaled juice outcome was delivered, and the actor had an  
179 additional 1 s of free viewing time to observe the recipient. To reject the juice offer, the actor  
180 could abort fixation after the rotated cue appeared or fail to saccade to the peripheral target.  
181 Aborted trials were followed by a white screen that lasted 5 s and were repeated if the actor



182 aborted before having seen the juice offer but not repeated if the actor had seen the juice offer.  
183 All trials were separated by a blank interval of 0.7-1.3 s. Actors worked for either 0.3 or 0.5 ml  
184 of juice per reward, depending on individual motivation, and recipients always received 0.5 ml  
185 of juice per reward. The amount of juice per reward was held constant within a given session.  
186 The delivery times were calibrated such that juice delivery, or unfilled interval if it was a *neither*  
187 offer, lasted the same duration for all three conditions. Juice offers were pseudo-randomly  
188 determined, with the constraints that half of offers were *self* to maintain motivation, there were  
189 an equal number of *other* and *neither* offers, and an offer could appear no more than four times  
190 in a row. Monkeys completed one 600-trial session per day. Nonsocial sessions were identical to  
191 Social sessions except for the use of a different stimulus and the presence of a juice receptacle  
192 instead of the recipient monkey. Social and Nonsocial sessions were run in blocks of 10 sessions  
193 with an ABBA or ABAB pattern, with half of monkeys assigned to each pattern.

194

#### 195 **2.1.4 Data analysis**

196 Completion rates of *other* and *neither* trials were compared using paired t tests. We analyzed  
197 both as a group across individuals and for each individual monkey across sessions. Pupil traces  
198 were smoothed with a zero-phase low-pass digital filter using the `filtfilt` function in MatLab  
199 (MathWorks, Inc.) to compensate for the fact that our data acquisition system records at higher  
200 frequency than is sent by the eye tracker. Outliers in which the value at a particular millisecond  
201 was more than 3 SD away from the median of all other trials of that same type in that session  
202 were removed. We normalized the data for each trial as a proportion change from the initial 50  
203 ms of that trial during fixation. All pupil data were expressed as z values, as in previous  
204 investigations of pupil size<sup>13,14</sup> to control for individual differences in pupil dynamic range.

205 Statistical analyses were run on the last 50 ms of fixation to the cue and on the 50 ms of hold on  
206 the peripheral saccade target. Trial completion rates and pupillary changes were analyzed via  
207 two-way ANOVA with outcome and session type (Social and Nonsocial) as factors. All tests  
208 were two tailed with an alpha of 0.05. Four actors completed 20 sessions each of Social and  
209 Nonsocial trials, one actor completed 40 sessions of each type, and one actor completed 50  
210 sessions of each time. To ensure the same amount of data was analyzed for each animal  
211 regardless of learning rate, data analysis was limited to the last 20 Social sessions and the last 20  
212 Nonsocial sessions. This number of sessions is similar to that reported in Experiment 2.

213

## 214 **2.2 Results**

215 In the Social sessions, monkeys completed the most *self* trials, the next most *other* trials, and the  
216 fewest *neither* trials (Fig 2a). There was an interaction between outcome and session type ( $F_{(2,10)}$   
217  $= 4.84$ ,  $p = .034$ ; partial  $\eta^2 = .492$ ) illustrating that trial completion rates depended on both the  
218 juice offer and whether the partner was present. The critical preference for *other* trials over  
219 *neither* trials was significant at both the group level ( $t_5 = 5.87$ ,  $p = .002$ ,  $d = 2.40$ ) and for each of  
220 the six individual monkeys (all  $ps < .028$ ). In the Nonsocial sessions, during which the recipient  
221 partner (*other*) was replaced with a juice collection cylinder, there was no preference for *other*  
222 over *neither* trials (Fig 2c;  $t_5 = 1.27$ ,  $p = .260$ ). This reproduces the main behavioral finding from  
223 Chang et al. <sup>1,7,8,15</sup>, showing a reliable prosocial preference for giving juice to another monkey  
224 over wasting juice. Further, it demonstrates that the effect depended on the presence of the other  
225 monkey.

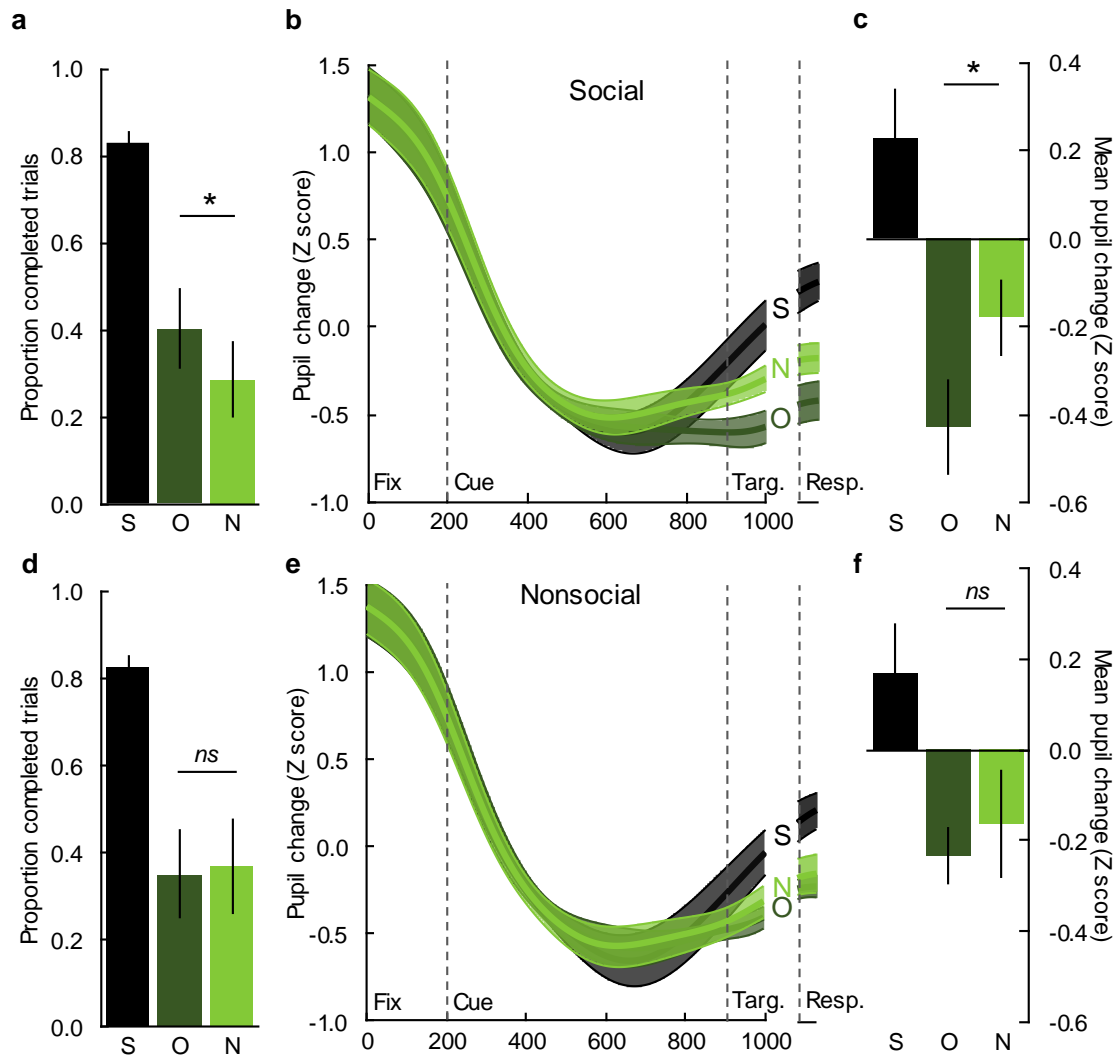

226

227

228

229

230

231

232

233

234

**Figure 2. Pupils were more constricted in anticipation of preferred prosocial *other* trials than *neither* trials.** a. Proportion ( $\pm$ SEM) of *self* (S), *other* (O), and *neither* (N) trials completed in the Social sessions. b. Relative pupil change across the trial in the Social sessions aligned to the onset of fixation (Fix) and to the saccade response (Resp). Error bars and shaded bands are  $\pm$ SEM. c. Mean ( $\pm$ SEM) pupil diameter for each reward outcome in Social sessions during fixation on the peripheral target, before reward delivery. d e & f. Same as for a-c, above, but for the Nonsocial sessions.

235 Monkeys' pupils constricted in the first half of the trial with the increased light from the fixation  
236 stimulus and then rebounded in the second half of the trial in anticipation of the reward outcome  
237 (Fig 1b & d). In Social sessions, this rebound was largest in anticipation of reward to *self*,  
238 moderate in anticipation of reward to *neither*, and, surprisingly, least in response to reward to  
239 *other* (Fig 2b). This difference was significant both in the epoch just before breaking central  
240 fixation and the epoch fixating on the peripheral saccade target before reward delivery (central  
241 fix:  $t_5 = 3.13$ ,  $p = .026$ ,  $d = 1.28$ ; peripheral fix:  $t_5 = 3.47$ ,  $p = .018$ ,  $d = 1.42$ ). Notably, the  
242 ordering of the pupil effect, *self*>*neither*>*other* was different than the ordering of the trial  
243 completion effect, *self*>*other*>*neither*. In the Nonsocial control sessions, pupil size was still  
244 widest in anticipation of *self* rewards, but did not differ between *other* and *neither* trials (Fig 2d;  
245 central fix:  $t_5 = 0.98$ ,  $p = .372$ ; peripheral fix:  $t_5 = 0.90$ ,  $p = .410$ ). A two-way ANOVA with  
246 session type and outcome as factors found an interaction ( $F_{(2,10)} = 4.32$ ,  $p = .044$ ; partial  $\eta^2 =$   
247  $.464$ ), where pupil diameter differences between outcome conditions depended on session type.  
248 This demonstrates that the pupil size difference between *other* and *neither* trials, like the trial  
249 completion rates, depended on the presence of the recipient monkey.

250

## 251 **3. Experiment 2 – New Haven laboratory**

### 252 **3.1 Methods**

#### 253 **3.1.1 Subjects**

254 Four rhesus macaques housed at Yale University in New Haven, CT, two males (monkeys K and  
255 H) and two females (monkeys E and C), aged 6-12 years, participated in this experiment.  
256 Monkeys were socially housed in pairs but were not matched with cage mates during the  
257 experiments. However, all four participating monkeys had visual access to one another in the

258 colony room. Housing was on a 12:12 light:dark cycle with *ad libitum* food. Daily fluid was  
259 controlled such that monkeys maintained both good motivation in the test apparatus, good health,  
260 and a weight above 85% of their free-feeding weight. Prior to this study, we implanted each  
261 monkey with a head post (Crist Instruments or GrayMatter Research) to allow head-restrained  
262 eye tracking and shaped each monkey to perform a basic oculomotor saccade task. All  
263 procedures were conducted in accordance with the *Guide for the Care and Use of Laboratory*  
264 *Animals*<sup>16</sup> and with approval from the Yale University Institutional Animal Care and Use  
265 Committee.

266

### 267 **3.1.2 Apparatus and stimuli**

268 Each monkey faced its own display screen; the screens were situated at a 90° angle from one  
269 another. The recipient monkey was always situated diagonally across from the actor monkey to  
270 the right from the actor's screen (Fig 3). Each monkey was fitted with a juice tube for delivering  
271 rewards. The solenoid valves that delivered the liquid rewards were placed in another room to  
272 prevent monkeys from forming secondary associations between solenoid clicks and different  
273 reward types. Three separate solenoids were used for delivering juice to the actor (*self*), the  
274 recipient (*other*), and to the juice collection bottle (*neither*), thus controlling for secondary  
275 associations. All experiments were carried out in a dimly lit room to ensure visibility of the actor  
276 and recipient monkey. Both actor and recipient were head-restrained during the experiments. Eye  
277 position and pupil diameter were recorded at 1,000 Hz (EyeLink, SR Research). Stimuli were  
278 colored squares. Different colors signaled different reward conditions. Stimuli were controlled  
279 by a computer running custom software (Picto).

280

### 281 **3.1.3 Behavioral Procedures**

282 Two monkeys participated in the task at a given time, one actor and one recipient. Monkeys K  
283 and H (males) played the role of actor, while monkeys E and C (females) played recipient to K  
284 and H, respectively.

285  
286 An actor began a trial by fixating on a central square for 150 ms. The reward value on each trial  
287 was then specified by a vertical bar indicating juice volume (0.2, 0.4, or 0.6 ml). The actor was  
288 required to maintain fixation on the vertical bar for 400 ms. Following a variable delay (200,  
289 400, or 600 ms), the actor was presented with either a choice (75%) or a cued (25%) trial. On  
290 cued trials, a cue signaling reward outcome (*self*, *other*, *both*, or *neither*) was presented at the  
291 center of the screen. To accept the offer, the actor had to maintain fixation for 150 ms. Upon  
292 successful completion of the fixation requirement, there was a random delay (200, 400, 600, or  
293 800 ms) before the cued juice outcome was delivered to the actor (*self* cue), the recipient (*other*  
294 cue), both the actor and the recipient (*both* cue), or no one (*neither* cue). After the reward  
295 delivery, the actor had an additional 2.5 s of free viewing time during which he was free to look  
296 at the recipient or any other locations in the setup. To reject the juice offer, the actor could  
297 simply abort fixation after the shape cue appeared. Aborted trials were followed by a white  
298 screen that lasted 5 s and were repeated if the actor aborted before having seen the juice offer but  
299 not repeated if the actor had seen the juice offer. All trials were separated by a blank interval of  
300 2.5 s. On choice trials, two cues appeared on the screen simultaneously, one to each side of the  
301 center. To ensure the actors had nothing to gain or lose with respect their own reward outcome,  
302 there were only two possible choices on offer: *self* vs. *both* and *other* vs. *neither*. Again, these  
303 options were always paired in choice trials such that there is no primary reward gain or loss from

304 the perspective of the actor monkeys, controlling for a confound in self reward contingency.  
305 Timing of choice trials was identical to that of cued trials except now monkeys needed to make a  
306 saccade to select their choice.

307

308 Cued and choice trials were pseudo-randomly interleaved. As in Experiment 1, juice offers (*self*,  
309 *both*, *other*, and *neither*) were pseudo-randomly determined on the cued trials, with equal  
310 probabilities. On *both* trials (cued and choice), the two monkeys received the same amount of  
311 juice at the same time. The *neither* trial delivered juice to a bottle situated across from the  
312 recipient monkey, to the left of the actor. Combining both monkeys, 57 days of data were  
313 collected with  $315.75 \pm 119.11$  ( $M \pm SD$ ) trials per day.

314

### 315 **3.1.4 Data Analysis**

316 Data from the choice trials were used to evaluate each monkey's social preferences. Only  
317 completed choice trials were included. Preference was measured via proportion of each choice  
318 for the two trial types. Differences in proportion choice were analyzed using a t test.

319

320 Data from the cued trials were used to determine pupil responses to avoid the potential confound  
321 associated with measuring pupil diameter on choice trials involving eye movements. Only  
322 completed cue trials were analyzed. Data were smoothed with a zero-phase low-pass digital filter  
323 using the `filtfilt` function in Matlab. Pupil diameter was normalized trial by trial to the 150 ms  
324 fixation period. All pupil data were expressed as z values, as in previous investigations of pupil  
325 size<sup>13,14</sup>, to control for individual differences in pupil dynamic range. Pupil data were analyzed  
326 across the four outcomes from 200-800 ms after cue onset using a one-way ANOVA and post

327 hoc Tukey test. Analysis of additional epochs yielded similar results. All tests were two tailed  
328 with an alpha of 0.05.

329

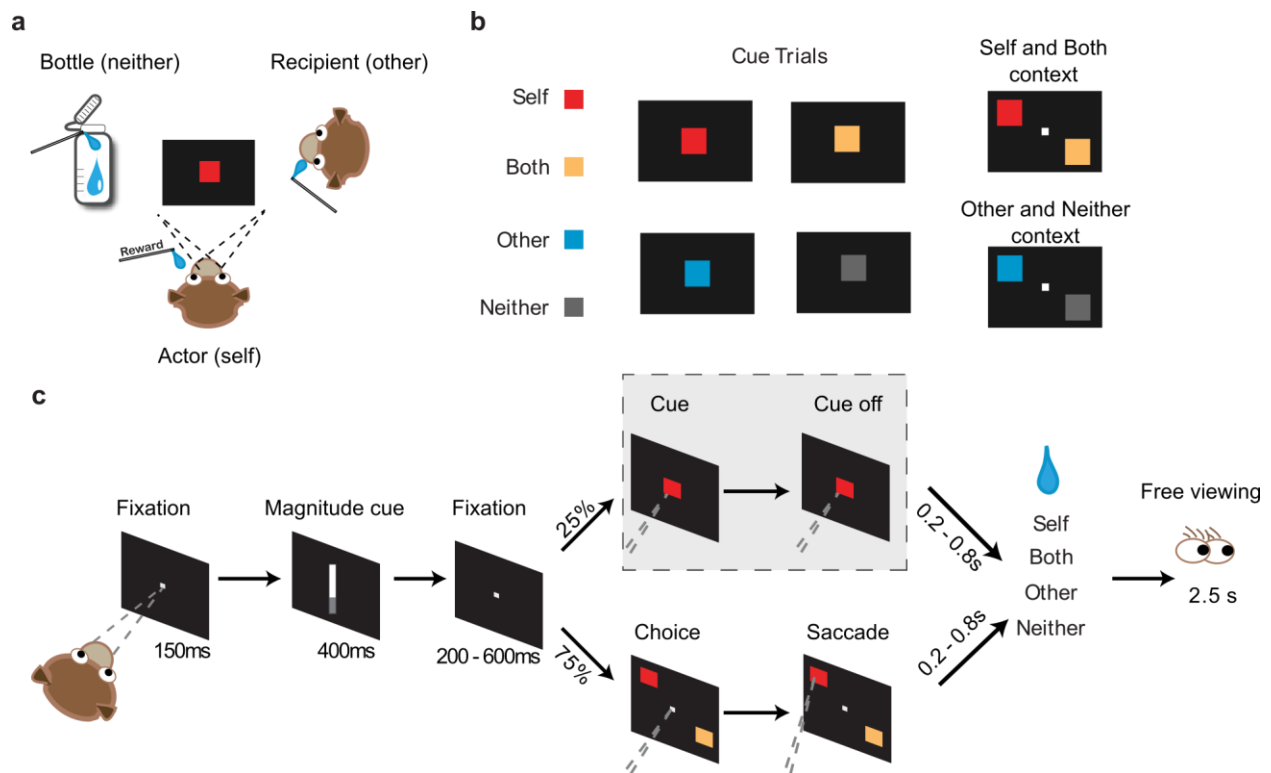

330

331 **Figure 3. Social reward allocation task used in Experiment 2.** a. Top down schematic  
332 of the testing arrangement with the actor monkey facing an LCD screen next to a  
333 recipient and an empty juice collection bottle. The recipient also faced his own LCD  
334 screen (not pictured), which showed the same stimuli. b. Left, example stimuli on the  
335 cued trials, in which a reward predicting cue that appeared on the center of the screen  
336 mapped onto a juice reward delivered to the actor (*self*), the recipient (*other*), both  
337 monkeys (*both*), or the juice collection bottle (*neither*). Right, example stimuli on choice  
338 trials, in which the actor chose between delivering a reward to self or to self and the



339 recipient (*self* vs. *both*) on some trials and between delivering a reward to the recipient or  
340 the bottle (*other* vs. *neither*) on other trials. c. A schematic of the trial progression.

341

### 342 3.2 Results

343 Previously, we have shown that actor monkeys develop a typical pattern of social preferences in  
344 the social reward allocation task; they choose *other* over *neither* (prosocial preference), and  
345 choose *self* over *both* (antisocial preference)<sup>1,7,8,15</sup>. Here, we first replicated this behavioral  
346 finding (Fig 4a). Both actor monkeys significantly preferred choosing *self* ( $M \pm SEM; 0.55 \pm$   
347  $0.01$ ), over *both* ( $0.45 \pm 0.01$ ) reward outcome ( $t_{96} = 6.01, p < 0.001$ ). This is consistent with  
348 previous work showing monkeys to be antisocial in reward contexts where they themselves  
349 receive a reward. Critically, monkeys preferred choosing *other* ( $0.67 \pm 0.01$ ) over *neither* ( $0.33 \pm$   
350  $0.01$ ) reward outcome ( $t_{96} = 25.20, p < 0.001$ ) indicating a prosocial preference in the *other*  
351 versus *neither* trials when they themselves could not receive a reward. This is consistent with  
352 monkeys having context-dependent prosocial and antisocial preferences in the social reward  
353 allocation task.

354

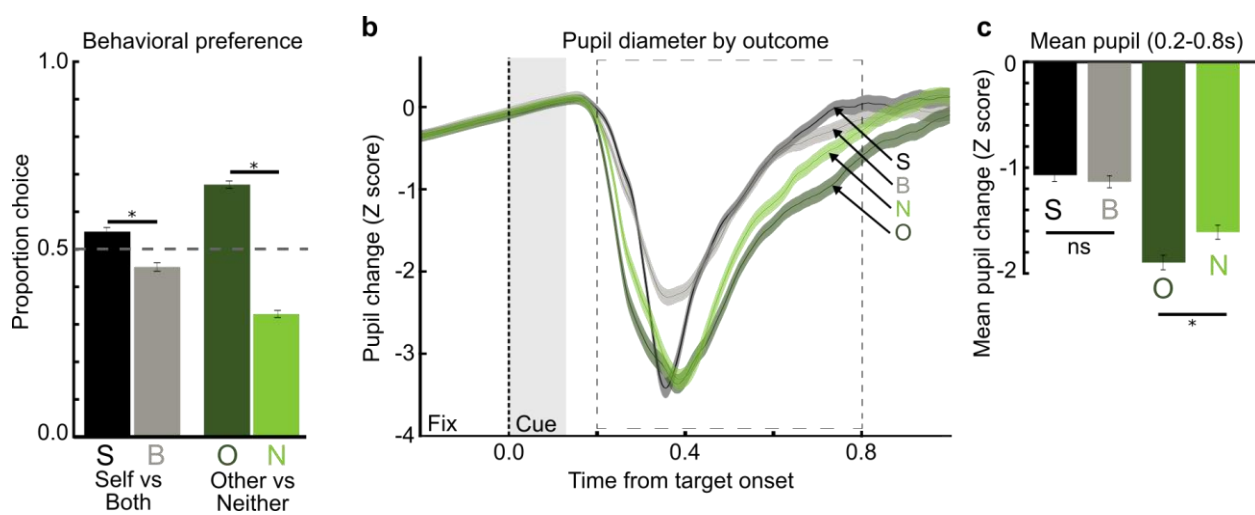

355

356 **Figure 4. Pupils were more constricted in anticipation of preferred prosocial *other***  
357 **trials than *neither* trials.** a. Behavioral preference from choice trials. Actor monkeys  
358 chose between *self* and *both* reward conditions on one trial type and between *other* and  
359 *neither* reward conditions on another trial type. Proportion choice indicates decision  
360 preferences for choosing *self* and choosing *other* in each condition. b. Relative changes in  
361 pupil size after *self* cue (S), *both* cue (B), *other* cue (O), and *neither* cue (N) trials are  
362 shown aligned to the onset of the cue (Cue) with previous fixation noted (Fix). Dashed  
363 line box indicates analysis epoch. Shorter analysis epochs showed similar effects. Error  
364 bars and shaded bands are  $\pm$ SEM. c. Average pupil diameter for each outcome during the  
365 600-ms analysis epoch. The *neither* (N) reward outcome is associated with a larger pupil  
366 diameter than the *other* (O) reward outcome. Reward received trials (S, B) are associated  
367 with larger pupil diameter than reward forgone (O, N) trials.

368

369 Pupil size predominantly reflected the differences between the reward forgone (*other* and *neither*  
370 trials) and reward received (*self* and *both*) conditions (Fig 4b) as measured by one-way ANOVA  
371 with reward outcome as the factor ( $F_{(3,40)} = 4.15, p < 0.001$ ). Within reward received trials, pupil  
372 diameter did not differ significantly between *self* ( $M \pm SEM; -1.12 \pm 0.06$ ) and *both* ( $-1.07 \pm$   
373  $0.06$ ) reward outcomes (Tukey test,  $p=0.93$ ). This is not altogether unexpected given the strong  
374 role of primary reward in autonomic arousal and that monkeys were consuming a juice reward in  
375 both circumstances.

376

377 Importantly, as in Experiment 1, monkeys had larger pupil diameters following the *neither* cue ( $-$   
378  $1.7 \pm 0.75$ ) than the *other* cue ( $-1.9 \pm 0.76$ , Tukey test  $p<0.01$ ). This difference is notable as it is

379 opposite the explicit social preference of the animals in which they preferred choosing *other* over  
380 *neither*. Taken together, the pattern of findings from Experiments 1 and 2 indicates that pupillary  
381 responses are not indexing prosocial preference.

382

#### 383 **4. General discussion**

384 Across two laboratories, with different monkeys, different versions of a social reward allocation  
385 task, and different stimuli, we found that monkeys' pupils were paradoxically narrower in  
386 anticipation of the preferred prosocial outcome (*other* trials) relative to the less preferred  
387 antisocial outcome (*neither* trials). This is contrary to what is usually observed in studies that  
388 manipulate reward magnitude, in which pupil size continually increases as outcomes become  
389 more preferred<sup>10</sup>. In this task, vicarious reward does not correspond with increasing pupil  
390 diameter.

391

392 One parsimonious explanation for this orthogonal ordering of outcome preference and pupil size  
393 is that trial preference indexes outcome valence, pupil size indexes outcome salience, and the  
394 relation between valence and salience is U-shaped (Fig 5). Under this explanation, *self* and *both*  
395 have a strong positive valence and high salience, *other* has a weak positive or even neutral  
396 valence and a low salience, and *neither* has a negative valence and a moderate salience.

397 Evaluating this explanation will require additional studies, perhaps using different manipulations  
398 of outcome valence<sup>2</sup>.

399

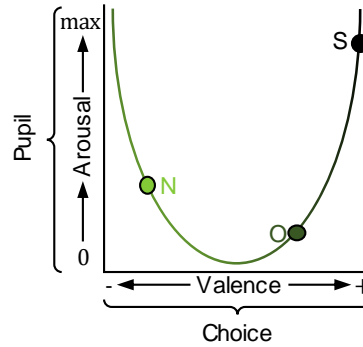

400

401

**Figure 5. Hypothetical relation between arousal and valence.** Outcome

402

valence, from negative to positive, is depicted as a U-shaped function of the

403

autonomic arousal produced by the outcome. Reward outcomes are placed in

404

hypothetical locations along this continuum. Our results are consistent with the

405

explanation that pupil size tracks arousal whereas outcome preference tracks

406

valence. Reward to *Self* (S) would have high arousal and positive valence. Reward

407

to *Other* (O) would have low arousal and positive valence. Reward to *Neither* (N)

408

would have medium arousal and negative valence.

409

410 One alternative explanation is that the wider pupils in anticipation of *neither* rewards, relative to

411

*other* rewards, reflects more effortful cognitive processing. In humans, pupils widen during

412

problem solving and decision making, and this dilation is more pronounced when subjects are

413

uncertain about their decision<sup>17-19</sup>. For our monkeys, it is possible that accepting a trial that

414

would deny juice to their partner was cognitively effortful, involved more covert attention, or

415

was done with uncertainty. However, comparing the pupil traces in the Social and Nonsocial

416

session in Experiment 1 suggests that pupils were abnormally constricted on *other* trials rather

417

than being abnormally dilated on *neither* trials. This “level-of-processing” hypothesis will

418

require more investigation.

419  
420 A second alternative explanation for the different orders of trial completion rates and pupil  
421 widths is that monkeys give juice to another monkey under duress. Wide pupils usually predict  
422 preferred outcomes, so the constricted pupils in anticipation of juice reward to the other monkey  
423 might indicate that actor monkeys found the prosocial choices to be aversive. Primates do engage  
424 in social interactions they find aversive, such as when subordinate macaques tolerate dominant  
425 monkeys stealing stored food directly out of their cheek pouches<sup>20</sup>. Such obligate prosociality is  
426 an intriguing hypothesis, but unlikely. Obligate prosociality should occur more in subordinate  
427 individuals but our effect was observed in both dominants and subordinates. Further, anecdotal  
428 evidence suggests that the prosocial preference for *other* over *neither* may even be stronger in  
429 dominant individuals who would have no need to oblige their subordinate partners<sup>1,2</sup>. Lastly,  
430 although our actors knew their testing partners, they did not live together. Thus, it is unlikely that  
431 they grudgingly preferred the *other* rewards because they feared later retribution.

432  
433 Our pupil size effect mirrors the group firing rate pattern of neurons on the gyral portion of the  
434 anterior cingulate cortex (ACCg) found in a previous study using cued social reward outcomes<sup>7</sup>.  
435 Individual ACCg cells were active in anticipation of reward delivery to *self*, *other*, or *both*  
436 monkeys. As a population, in the cued-reward condition, which is closest to the conditions used  
437 in this study, the ACCg neuronal firing rate was numerically highest to *self*, next highest to  
438 *neither*, and lowest to *other* (see Chang et al., 2013, Fig 3e). The same ordering of ACCg firing  
439 rate and pupil size serves as supporting evidence linking monkeys' prosocial behavior,  
440 autonomic arousal, and ACCg activity.

441

442 The ACC is strongly connected to the locus coeruleus<sup>21,22</sup>, and locus coeruleus activity correlates  
443 with pupil size<sup>14</sup>. Causally, aspiration lesions of the subgenual ACC abolish the sustained pupil  
444 dilation in anticipation of reward<sup>13</sup> and aspiration lesions of the ACC gyrus reduce the delay  
445 monkeys normally exhibit when retrieving food in the presence of social stimuli<sup>23</sup>. Together,  
446 these findings suggest that the relation between prosocial behavior and autonomic arousal relies  
447 on a network of brain regions including the ACC. Future research should examine the causal  
448 contributions of the ACC to monkeys' prosocial tendencies and pupil size in this vicarious  
449 reinforcement test.

450

451 These findings, and the replicability and generalizability they demonstrate, suggest that the  
452 option of delivering juice rewards to no one instead of to the other individual in the social reward  
453 allocation task represents a particularly salient outcome for actor monkeys. Furthermore, these  
454 findings indicate that there is an interplay between reward and salience in the social reward  
455 allocation task, and likely in other social interaction paradigms. Lastly, these data demonstrate  
456 that autonomic measures like pupil size provide unique information that would not otherwise be  
457 detected via traditional measures like trial completion rates or choice preferences. Future studies  
458 of social cognition will benefit from including autonomic measures.

459

460

## 461 **References**

- 462 1 Chang, S., Winecoff, A. & Platt, M. Vicarious reinforcement in rhesus macaques  
463 (macaca mulatta). *Frontiers in Neuroscience* **5**, doi:10.3389/fnins.2011.00027 (2011).
- 464 2 Ballesta, S. & Duhamel, J.-R. Rudimentary empathy in macaques' social decision-  
465 making. *Proceedings of the National Academy of Sciences* **112**, 15516-15521 (2015).
- 466 3 Horner, V., Carter, J. D., Suchak, M. & de Waal, F. B. Spontaneous prosocial choice by  
467 chimpanzees. *Proceedings of the National Academy of Sciences* **108**, 13847-13851  
468 (2011).
- 469 4 Haroush, K. & Williams, Z. M. Neuronal prediction of opponent's behavior during  
470 cooperative social interchange in primates. *Cell* **160**, 1233-1245 (2015).
- 471 5 Hosokawa, T. & Watanabe, M. Egalitarian reward contingency in competitive games and  
472 primate prefrontal neuronal activity. *Frontiers in Neuroscience* **9**,  
473 doi:10.3389/fnins.2015.00165 (2015).
- 474 6 Amici, F., Visalberghi, E. & Call, J. Lack of prosociality in great apes, capuchin monkeys  
475 and spider monkeys: Convergent evidence from two different food distribution tasks.  
476 *Proc. R. Soc. B* **281**, 20141699 (2014).
- 477 7 Chang, S. W., Gariépy, J.-F. & Platt, M. L. Neuronal reference frames for social  
478 decisions in primate frontal cortex. *Nature neuroscience* **16**, 243 (2013).
- 479 8 Chang, S. W. C. *et al.* Neural mechanisms of social decision-making in the primate  
480 amygdala. *Proceedings of the National Academy of Sciences* **112**, 16012-16017,  
481 doi:10.1073/pnas.1514761112 (2015).

- 482 9 Noritake, A., Ninomiya, T. & Isoda, M. Social reward monitoring and valuation in the  
483 macaque brain. *Nature Neuroscience* **21**, 1452-1462, doi:10.1038/s41593-018-0229-7  
484 (2018).
- 485 10 Mitz, A. R., Chacko, R. V., Putnam, P. T., Rudebeck, P. H. & Murray, E. A. Using pupil  
486 size and heart rate to infer affective states during behavioral neurophysiology and  
487 neuropsychology experiments. *Journal of neuroscience methods* **279**, 1-12 (2017).
- 488 11 Adams, D. L., Economides, J. R., Jocson, C. M. & Horton, J. C. A biocompatible  
489 titanium headpost for stabilizing behaving monkeys. *J. Neurophysiol.* **98**, 993-1001,  
490 doi:10.1152/jn.00102.2007 (2007).
- 491 12 Cronin, K. A. Unnatural paradigm calls into question whether macaques' social decisions  
492 represent empathy. *Proceedings of the National Academy of Sciences*, 201600575 (2016).
- 493 13 Rudebeck, P. H. *et al.* A role for primate subgenual cingulate cortex in sustaining  
494 autonomic arousal. *Proceedings of the National Academy of Sciences* **111**, 5391-5396  
495 (2014).
- 496 14 Joshi, S., Li, Y., Kalwani, R. M. & Gold, J. I. Relationships between pupil diameter and  
497 neuronal activity in the locus coeruleus, colliculi, and cingulate cortex. *Neuron* **89**, 221-  
498 234 (2016).
- 499 15 Chang, S. W., Barter, J. W., Ebitz, R. B., Watson, K. K. & Platt, M. L. Inhaled oxytocin  
500 amplifies both vicarious reinforcement and self reinforcement in rhesus macaques  
501 (*macaca mulatta*). *Proceedings of the National Academy of Sciences* **109**, 959-964  
502 (2012).
- 503 16 Council, N. R. *Guide for the care and use of laboratory animals: Eighth edition.*  
504 (National Academies Press, 2011).



- 505 17 Lempert, K. M., Chen, Y. L. & Fleming, S. M. Relating pupil dilation and metacognitive  
506 confidence during auditory decision-making. *PLOS ONE* **10**, e0126588,  
507 doi:10.1371/journal.pone.0126588 (2015).
- 508 18 Hess, E. H. & Polt, J. M. Pupil size in relation to mental activity during simple problem-  
509 solving. *Science* **143**, 1190-1192, doi:10.1126/science.143.3611.1190 (1964).
- 510 19 Urai, A. E., Braun, A. & Donner, T. H. Pupil-linked arousal is driven by decision  
511 uncertainty and alters serial choice bias. *Nature Communications* **8**, 14637,  
512 doi:10.1038/ncomms14637 (2017).
- 513 20 Feistner, A. T. & McGrew, W. C. Food-sharing in primates: A critical review.  
514 *Perspectives in primate biology* **3** (1989).
- 515 21 Gompf, H. S. *et al.* Locus ceruleus and anterior cingulate cortex sustain wakefulness in a  
516 novel environment. *Journal of Neuroscience* **30**, 14543-14551 (2010).
- 517 22 Paus, T. Primate anterior cingulate cortex: Where motor control, drive and cognition  
518 interface. *Nature reviews neuroscience* **2**, 417 (2001).
- 519 23 Rudebeck, P. H., Buckley, M. J., Walton, M. E. & Rushworth, M. F. A role for the  
520 macaque anterior cingulate gyrus in social valuation. *Science* **313**, 1310-1312 (2006).

521

## 522 **Author Notes**

523 We thank Drs. Andrew R. Mitz, Jaewon Hwang, and Vincent D. Costa for technical support and  
524 analysis advice. This work was supported by funding from the National Institute of Mental  
525 Health (NIMH grants R01 MH120081, R01 MH110750, and ZIA MH00288712).
